# Supplementary material
Source: Springer Nature journal article supplement (https://www.springermedizin.de/resource/supplementary/13722_2013_245_MOESM1_ESM.pdf/9675334)

Central Coast Drug and Alcohol Service

13 consenting clinicians

77 consenting clients

ELIGIBLE CLIENT SAMPLE = 35  
(consenting clients whose clinicians  
also provided at least one session  
checklist for their treatment)

12 eligible clients exposed to SHADE  
(as evidenced by session checklists)

ELIGIBLE CLINICIAN SAMPLE = 13

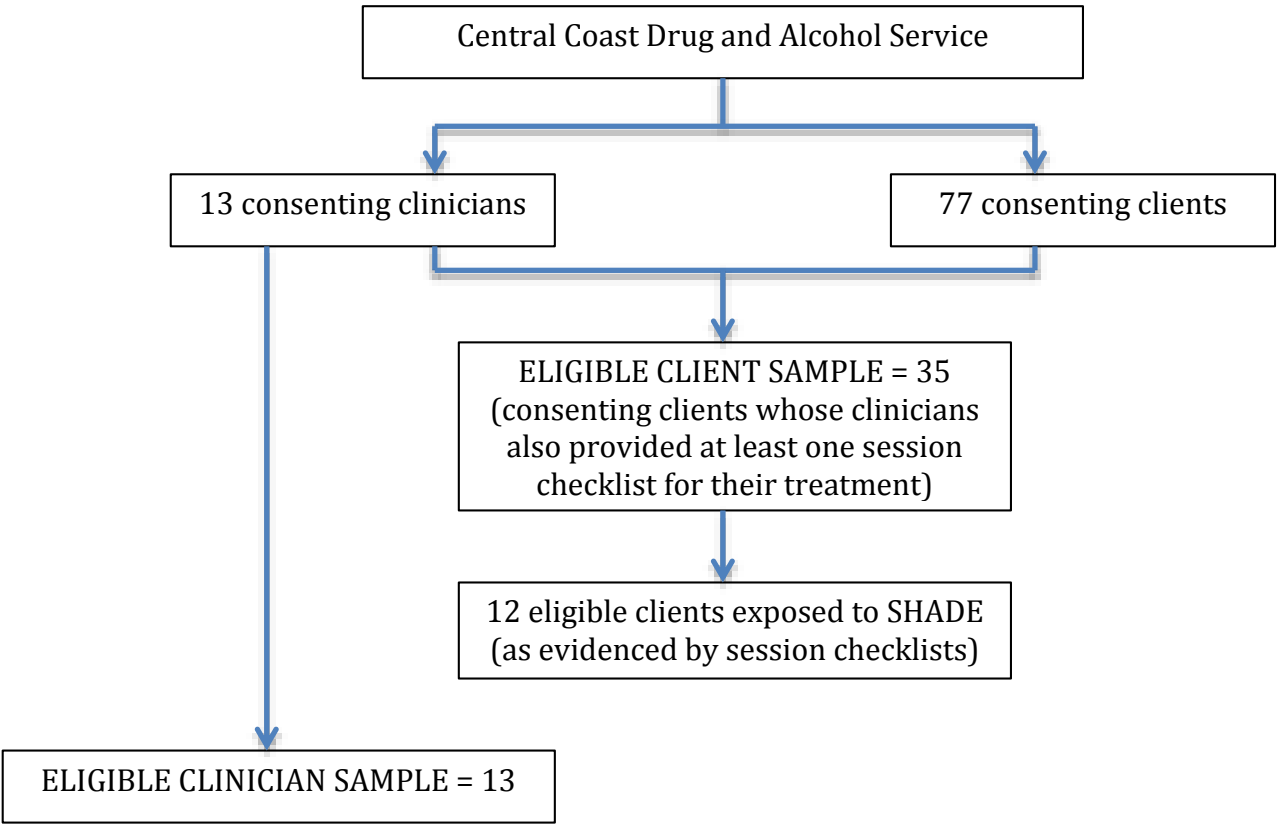

Supplement: MOESM1 [file 9675334]
